# Supplementary material for: Leaf color change and photosystem function evaluation under heat treatment revealed the stress resistance variation between Loropetalum chinense and L. chinense var. rubrum
Source: PeerJ. 2023 Feb 13;11:e14834. doi: 10.7717/peerj.14834 (PMC9933738; doi:10.7717/peerj.14834)
Supplement: Supplemental Information 1 [file peerj-11-14834-s001.xlsx]

## Sheet: Spectrophotometer
	L*	a*	b*		L*	a*	b*		L*	a*	b*
H				F				X
T0	24.73	2.37	-1.96	T0	28.3	6.65	5.4	T0	29.02	-8.53	7.86
	26.83	3.35	-1.87		30.68	6.47	6.39		35.35	-13.65	18.5
	25.62	2.02	-1.9		28.65	11.97	3.61		28.7	-6.65	6.38
	26.11	1.77	-0.99		31.69	7.27	7.21		29.21	-9.43	8.24
	27.9	2.22	-1.76		29.13	7.43	5.2		37.55	-15.67	23.73
	26.238	2.346	-1.696		29.69	7.958	5.562		31.966	-10.786	12.942
	1.20261	0.604673	0.401285		1.44113	2.27889	1.3573		4.17054	3.74469	7.71796
T1	25.85	2.47	-0.97	T1	27.67	6.71	3.7	T1	32.23	-12.98	15.34
	26.2	1.86	0.75		30.52	5.34	3.14		30.3	-10.26	11.43
	26.49	3.76	-0.55		27.67	6.44	3.19		27.88	-8.58	8.28
	24	1.35	-0.76		29.08	10.01	5.68		27.85	-8.26	7.27
	24.94	2.74	-0.89		28.73	2.02	6.23		29.18	-8.29	9.33
	25.496	2.436	-0.484		28.734	6.104	4.388		29.488	-9.674	10.33
	1.01933	0.916204	0.70787		1.18044	2.87227	1.46016		1.83994	2.0239	3.19672
T3	26.06	1.2	0.27	T3	26.55	7.77	2.01	T3	28.99	-8.07	8.27
	27.4	2.1	2.87		31.66	7.92	5.41		32.1	-11.15	13.49
	26.39	4.56	1.1		28.38	8.69	3.78		28.91	-8.73	8.66
	27.68	2.22	2.31		29.46	6.68	2.67		29.52	-9.06	8.66
	26.64	2.92	-1.31		29.8	7.74	4.62		27.96	-7.07	6.69
	26.834	2.6	1.048		29.17	7.76	3.698		29.496	-8.816	9.154
	0.683725	1.25483	1.66437		1.88213	0.717182	1.38689		1.56046	1.50993	2.55645
T5	27.2	0.5	-1.05	T5	33.59	-1.11	8.64	T5	30.71	-6	8.05
	23.75	1.42	-1		28.16	3.78	4.54		34.52	-13.62	15.34
	27.51	0.73	0.46		32.71	0.87	9.92		28.75	-8.88	8.67
	24.88	1.14	-1.78		29.46	2.26	4.72		30.12	-8.24	7.93
	24.71	2.06	-0.81		28.94	3.14	5.98		29.33	-7.88	5.56
	25.61	1.17	-0.836		30.572	1.788	6.76		30.686	-8.924	9.11
	1.65383	0.611964	0.813038		2.41853	1.95319	2.40927		2.26976	2.83557	3.67848
T7	25.92	1.5	-0.39	T7	33.28	-4.62	10.6	T7	29.03	-5.46	6.92
	28.02	0.08	-0.83		31.51	-2.62	7.4		30.35	-5.63	8.14
	27.63	0.07	-0.29		32.64	-1.3	9.18		29.94	-6.43	9.16
	26.39	1.14	-0.41		31.14	-1.35	6.6		30.79	-6.76	9.87
	28.65	0.85	-0.99		31.33	-3.84	9.57		34.34	-4.97	9.79
	27.322	0.728	-0.582		31.98	-2.746	8.67		30.89	-5.85	8.776
	1.13797	0.639038	0.308091		0.932014	1.48023	1.63499		2.03508	0.731334	1.24717

## Sheet: pigment contents
	H								F								X
		chla	chlb	chla/b	car	ant	flav			chla	chlb	chla/b	car	ant	flav			chla	chlb	chla/b	car	ant	flav
	T0	0.942287	0.559881	1.68301	0.273848	1.16976	0.319306		T0	0.734256	0.445754	1.64722	0.147119	0.378754	0.307123		T0	0.950148	0.74583	1.27395	0.190133	0.0075145	0.587348
		0.914415	0.558252	1.638	0.26225	1.17685	0.319306			0.771084	0.471683	1.63475	0.156035	0.356783	0.302437			0.950158	0.75435	1.25957	0.205367	0.00500967	0.581724
		0.897638	0.519294	1.72857	0.255221	1.18395	0.310872			0.780098	0.471439	1.65472	0.160467	0.334813	0.320244			0.950118	0.72027	1.31911	0.206665	0.0596985	0.621087
		0.918113	0.545809	1.68319	0.263773	1.17685	0.316495			0.761812	0.462959	1.64556	0.15454	0.356783	0.309934			0.950141	0.74015	1.28421	0.200721	0.0240742	0.59672
		0.0184149	0.0187607	0.0369777	0.00767996	0.0057947	0.00397623			0.0198301	0.0121662	0.00823599	0.0055509	0.0179388	0.00753661			1.69967e-05	0.0144812	0.0253682	0.00750583	0.0252109	0.0173826
	T1	0.926363	0.84597	1.09503	0.155176	1.35678	0.243393		T1	0.792157	0.68416	1.15785	0.164989	0.340657	0.701687		T1	0.922922	0.533442	1.73013	0.257133	0.00500967	0.500187
		0.934103	0.749106	1.24696	0.185031	1.38517	0.253702			0.771239	0.645487	1.19482	0.162671	0.33857	0.695127			0.91367	0.505368	1.80793	0.256293	0.00793197	0.514246
		0.931687	0.728022	1.27975	0.190779	1.38016	0.254639			0.829323	0.711754	1.16518	0.18434	0.336483	0.686692			0.936623	0.568722	1.64689	0.264882	0.0112717	0.507216
		0.930718	0.774366	1.20725	0.176995	1.37404	0.250578			0.797573	0.680467	1.17262	0.170667	0.33857	0.694502			0.924405	0.535844	1.72832	0.259436	0.00807113	0.507216
		0.00323343	0.0513581	0.0804704	0.0156061	0.0123717	0.00509513			0.0240202	0.0271791	0.0159794	0.00971465	0.00170432	0.00613773			0.00942877	0.0259199	0.0657569	0.00386598	0.00255838	0.0057392
	T3	0.916388	0.784182	1.16859	0.193134	1.16475	0.155295		T3	0.782453	0.815226	0.959799	0.170404	0.214163	0.860075		T3	0.936063	0.673458	1.38993	0.208742	0.0158639	0.298688
		0.91227	0.767208	1.18908	0.195784	1.16391	0.1806			0.798728	0.863134	0.925382	0.170766	0.197464	0.867573			0.93158	0.636432	1.46375	0.218862	0.138601	0.286504
		0.919168	0.825318	1.11371	0.185763	1.19147	0.177788			0.77336	0.792627	0.975693	0.166833	0.195377	0.863824			0.936402	0.67221	1.39302	0.212946	0.0275532	0.302437
		0.915942	0.792236	1.15713	0.19156	1.17337	0.171228			0.784847	0.823662	0.953624	0.169334	0.202335	0.863824			0.934682	0.6607	1.41557	0.213517	0.0606726	0.295876
		0.00283348	0.0243973	0.0318173	0.00423969	0.0127964	0.0113243			0.0104939	0.029396	0.0209983	0.0017746	0.00840722	0.00306091			0.0021976	0.0171676	0.0340948	0.00415116	0.0553098	0.00680148
	T5	0.910455	0.675468	1.34789	0.27637	1.18896	0.105623		T5	0.846521	0.780752	1.08424	0.169027	0.136513	0.622024		T5	0.929427	0.54807	1.69582	0.240025	0.00834944	0.286504
		0.901555	0.656796	1.37266	0.270369	1.16475	0.12343			0.790185	0.792185	0.997476	0.18081	0.134843	0.636082			0.946915	0.610092	1.55209	0.21984	0.00459219	0.277132
		0.8961	0.663984	1.34958	0.260636	1.17643	0.114995			0.859346	0.822932	1.04425	0.184042	0.097271	0.612652			0.950087	0.69471	1.6302	0.210482	0.068048	0.290253
		0.902703	0.665416	1.35671	0.269125	1.17671	0.114683			0.832018	0.798623	1.04199	0.17796	0.122876	0.623586			0.942143	0.617624	1.62604	0.223449	0.0269965	0.28463
		0.00591639	0.00768977	0.011298	0.00648365	0.00988705	0.00727301			0.0300398	0.0178115	0.0354569	0.00645278	0.0181183	0.00962889			0.00908425	0.060102	0.0587528	0.0123279	0.0290682	0.00551813
	T7	0.931478	0.84003	1.10886	0.227843	0.801546	0.00801546		T7	0.77722	1.20788	0.64346	0.215706	0.0563587	0.594845		T7	0.905108	1.06517	0.849727	0.16497	0.0304755	0.381162
		0.926083	0.898338	1.03088	0.21259	0.795653	0.00795653			0.812075	1.28763	0.630676	0.212583	0.0329803	0.617338			0.93413	1.07542	0.868616	0.133821	0.0212911	0.406467
		0.923362	0.908322	1.01656	0.207991	0.795702	0.00795702			0.80388	1.28811	0.624078	0.218235	0.0534364	0.593908			0.90172	1.0883	0.828555	0.10288	0.029223	0.376476
		0.926974	0.88223	1.0521	0.216141	0.797634	0.00797634			0.797725	1.2612	0.632738	0.215508	0.0475918	0.602031			0.913653	1.0763	0.848966	0.13389	0.0269965	0.388035
		0.0033724	0.030117	0.0405596	0.00848463	0.00276676	2.76676e-05			0.0148802	0.0377087	0.00804594	0.00231159	0.0104006	0.010831			0.0145457	0.00946314	0.0163637	0.0253483	0.00406663	0.0131729

## Sheet: Fluorescence
Fo	hzz	xnfd	xnxy		Fm	hzz	xnfd	xnxy		Fv/Fm	hzz	xnfd	xnxy		NPQ	hzz	xnfd	xnxy		QP	hzz	xnfd	xnxy
t0	5323	8396	5404		t0	26395.7	39801.5	27074		t0	0.800333	0.78775	0.8		t0	2.27	4.426	2.22		t0	0.183333	0.342	0.0933333
t1	6112	8641.6	4732.67		t1	32186	36509.8	22017.3		t1	0.81	0.7624	0.784		t1	2.4	2.735	2.23667		t1	0.306667	0.42	0.17
t3	6038	8984.33	4792.33		t3	29717.8	40509	23137.3		t3	0.8034	0.778	0.793		t3	2.614	2.46	2.3		t3	0.298	0.373333	0.15
t5	6034.75	8257.67	4440.33		t5	28194.2	37766.8	21535.7		t5	0.8085	0.7795	0.794		t5	2.73333	2.306	1.37		t5	0.29	0.326	0.113333
t7	6119.4	7745.5	4713.4		t7	32277.4	38086.2	21030.2		t7	0.8106	0.795	0.79375		t7	2.785	2.32333	1.002		t7	0.265	0.316667	0.108

## Sheet: correlation analysis
Cultivar	Parameters	Fo	Fm	Fv/Fm	NPQ	qP	Chla	Chlb	Car.	Ant.	Flav.
	Fo	1	0.807	0.826	0.716	0.933*	0.562	0.854	-0.601	-0.13	-0.766
	Fm		1	0.798	0.393	0.656	0.933*	0.915*	-0.801	-0.222	-0.38
	Fv/Fm			1	0.59	0.662	0.591	0.69	-0.351	-0.223	-0.613
	NPQ				1	0.525	0.064	0.644	-0.011	-0.635	-0.986
	qP					1	0.437	0.676	-0.631	0.209	-0.623
	Chla						1	0.778	-0.859	-0.112	-0.033
H	Chlb							1	-0.73	-0.443	-0.614
	Car.								1	-0.175	0.03
	Ant									1	0.499
	Flav.										1
	Fo	1	0.358	-0.676	0.097	0.72	-0.261	-0.593	-0.744	0.584	0.505
	Fm		1	0.446	0.365	-0.268	-0.183	-0.331	0.034	-0.034	0.358
	Fv/Fm			1	0.168	-0.899	-0.208	0.451	0.473	-0.554	-0.484
	NPQ				1	0.006	-0.769	-0.727	-0.64	0.717	-0.785
	qP					1	-0.179	-0.424	-0.461	0.682	0.449
	Chla						1	0.393	0.408	-0.579	0.369
F	Chlb							1	0.973	-0.886	0.35
	Car.								1	-0.842	0.175
	Ant									1	-0.272
	Flav.										1
	Fo	1	0.935	0.542	0.519	-0.372	0.615	-0.093	-0.461	0.541	0.794
	Fm		1	0.267	0.273	0.523	0.269	0.882	0.434	0.347	0.669
	Fv/Fm			1	-0.146	-0.89	0.271	0.446	-0.944	0.671	0.095
	NPQ				1	0.487	0.641	-0.661	0.202	0.331	0.417
	qP					1	-0.018	-0.606	0.784	-0.276	-0.153
	Chla						1	-0.738	-0.08	0.363	0.151
X	Chlb							1	-0.572	0.118	0.003
	Car.								1	-0.789	0.111
	Ant									1	-0.194
	Flav.										1
